# Supplementary material
Source: PubMed Central journal article supplement (PMC3490519)
Supplement: supp_dds358_dds358supp_table1.pdf [file supp_dds358_dds358supp_table1.pdf]

**Supplementary Table S1.** Predicted miRNA binding sites on the 3' UTR region of PDGF-BB mRNA by miRWalk and other prediction tools (contains all putative targets).

| MicroRNA        | StemLoop ID   | miRWalk | miRanda | miRDB | DIANAmT | PicTar5 | TargetScan | RNA22 | Total |
|-----------------|---------------|---------|---------|-------|---------|---------|------------|-------|-------|
| hsa-miR-432     | hsa-mir-432   | 1       | 1       | 1     | 1       | 0       | 1          | 1     | 6     |
| hsa-miR-329     | hsa-mir-329-2 | 1       | 1       | 0     | 1       | 0       | 1          | 1     | 5     |
| hsa-miR-29b     | hsa-mir-29b-2 | 1       | 1       | 0     | 1       | 1       | 1          | 0     | 5     |
| hsa-miR-588     | hsa-mir-588   | 1       | 1       | 1     | 1       | 0       | 1          | 0     | 5     |
| hsa-miR-590-3p  | hsa-mir-590   | 1       | 1       | 1     | 1       | 0       | 1          | 0     | 5     |
| hsa-miR-29c     | hsa-mir-29c   | 1       | 1       | 0     | 1       | 1       | 1          | 0     | 5     |
| hsa-miR-545     | hsa-mir-545   | 1       | 1       | 1     | 1       | 0       | 1          | 0     | 5     |
| hsa-miR-29a     | hsa-mir-29a   | 1       | 1       | 0     | 1       | 1       | 1          | 0     | 5     |
| hsa-miR-29b     | hsa-mir-29b-1 | 1       | 1       | 0     | 1       | 1       | 1          | 0     | 5     |
| hsa-miR-769-3p  | hsa-mir-769   | 1       | 1       | 0     | 1       | 0       | 1          | 0     | 4     |
| hsa-miR-193a-5p | hsa-mir-193a  | 1       | 1       | 0     | 1       | 0       | 1          | 0     | 4     |
| hsa-miR-920     | hsa-mir-920   | 1       | 1       | 0     | 1       | 0       | 1          | 0     | 4     |
| hsa-let-7f      | hsa-let-7f-2  | 1       | 1       | 0     | 1       | 0       | 1          | 0     | 4     |
| hsa-miR-624     | hsa-mir-624   | 1       | 1       | 0     | 1       | 0       | 1          | 0     | 4     |
| hsa-miR-520d-3p | hsa-mir-520d  | 1       | 1       | 0     | 1       | 0       | 1          | 0     | 4     |
| hsa-miR-342-3p  | hsa-mir-342   | 1       | 1       | 0     | 1       | 0       | 1          | 0     | 4     |
| hsa-miR-558     | hsa-mir-558   | 1       | 1       | 0     | 1       | 0       | 1          | 0     | 4     |
| hsa-miR-491-5p  | hsa-mir-491   | 1       | 1       | 0     | 1       | 0       | 1          | 0     | 4     |
| hsa-miR-138     | hsa-mir-138-1 | 1       | 1       | 0     | 1       | 0       | 1          | 0     | 4     |
| hsa-miR-421     | hsa-mir-421   | 1       | 1       | 0     | 1       | 0       | 1          | 0     | 4     |
| hsa-miR-608     | hsa-mir-608   | 1       | 1       | 0     | 1       | 0       | 1          | 0     | 4     |
| hsa-miR-138     | hsa-mir-138-2 | 1       | 1       | 0     | 1       | 0       | 1          | 0     | 4     |
| hsa-miR-20a     | hsa-mir-20a   | 1       | 1       | 0     | 1       | 0       | 1          | 0     | 4     |
| hsa-miR-29c     | hsa-mir-29c   | 1       | 0       | 0     | 1       | 1       | 1          | 0     | 4     |
| hsa-miR-648     | hsa-mir-648   | 1       | 1       | 0     | 1       | 0       | 1          | 0     | 4     |
| hsa-miR-765     | hsa-mir-765   | 1       | 1       | 0     | 1       | 0       | 1          | 0     | 4     |
| hsa-let-7a      | hsa-let-7a-1  | 1       | 1       | 0     | 1       | 0       | 1          | 0     | 4     |
| hsa-miR-583     | hsa-mir-583   | 1       | 1       | 0     | 1       | 0       | 1          | 0     | 4     |
| hsa-miR-515-5p  | hsa-mir-515-2 | 1       | 1       | 0     | 1       | 0       | 1          | 0     | 4     |
| hsa-miR-384     | hsa-mir-384   | 1       | 1       | 0     | 1       | 0       | 1          | 0     | 4     |
| hsa-miR-924     | hsa-mir-924   | 1       | 1       | 0     | 1       | 0       | 1          | 0     | 4     |
| hsa-miR-625     | hsa-mir-625   | 1       | 1       | 0     | 1       | 0       | 1          | 0     | 4     |
| hsa-let-7c      | hsa-let-7c    | 1       | 1       | 0     | 1       | 0       | 1          | 0     | 4     |
| hsa-miR-612     | hsa-mir-612   | 1       | 1       | 0     | 1       | 0       | 1          | 0     | 4     |
| hsa-miR-520b    | hsa-mir-520b  | 1       | 1       | 0     | 1       | 0       | 1          | 0     | 4     |
| hsa-miR-34a     | hsa-mir-34a   | 1       | 1       | 0     | 1       | 0       | 1          | 0     | 4     |
| hsa-miR-140-3p  | hsa-mir-140   | 1       | 1       | 0     | 1       | 0       | 1          | 0     | 4     |
| hsa-miR-650     | hsa-mir-650   | 1       | 1       | 0     | 1       | 0       | 1          | 0     | 4     |
| hsa-miR-675     | hsa-mir-675   | 1       | 1       | 0     | 1       | 0       | 1          | 0     | 4     |
| hsa-miR-519c-3p | hsa-mir-519c  | 1       | 1       | 0     | 1       | 0       | 1          | 0     | 4     |
| hsa-miR-106b    | hsa-mir-106b  | 1       | 1       | 0     | 1       | 0       | 1          | 0     | 4     |
| hsa-miR-106a    | hsa-mir-106a  | 1       | 1       | 0     | 1       | 0       | 1          | 0     | 4     |
| hsa-let-7g      | hsa-let-7g    | 1       | 1       | 0     | 1       | 0       | 1          | 0     | 4     |
| hsa-miR-939     | hsa-mir-939   | 1       | 1       | 0     | 1       | 0       | 1          | 0     | 4     |
| hsa-miR-17      | hsa-mir-17    | 1       | 1       | 0     | 1       | 0       | 1          | 0     | 4     |

|                 |                |   |   |   |   |   |   |   |   |
|-----------------|----------------|---|---|---|---|---|---|---|---|
| hsa-miR-570     | hsa-mir-570    | 1 | 1 | 0 | 1 | 0 | 1 | 0 | 4 |
| hsa-miR-150     | hsa-mir-150    | 1 | 1 | 0 | 1 | 0 | 1 | 0 | 4 |
| hsa-miR-93      | hsa-mir-93     | 1 | 1 | 0 | 1 | 0 | 1 | 0 | 4 |
| hsa-miR-767-5p  | hsa-mir-767    | 1 | 1 | 0 | 1 | 0 | 1 | 0 | 4 |
| hsa-let-7d      | hsa-let-7d     | 1 | 1 | 0 | 1 | 0 | 1 | 0 | 4 |
| hsa-miR-29a     | hsa-mir-29a    | 1 | 0 | 0 | 1 | 1 | 1 | 0 | 4 |
| hsa-miR-520c-3p | hsa-mir-520c   | 1 | 1 | 0 | 1 | 0 | 1 | 0 | 4 |
| hsa-miR-455-3p  | hsa-mir-455    | 1 | 1 | 0 | 1 | 0 | 1 | 0 | 4 |
| hsa-miR-661     | hsa-mir-661    | 1 | 1 | 0 | 1 | 0 | 1 | 0 | 4 |
| hsa-miR-300     | hsa-mir-300    | 1 | 1 | 0 | 1 | 0 | 1 | 0 | 4 |
| hsa-let-7a      | hsa-let-7a-2   | 1 | 1 | 0 | 1 | 0 | 1 | 0 | 4 |
| hsa-miR-520a-3p | hsa-mir-520a   | 1 | 1 | 0 | 1 | 0 | 1 | 0 | 4 |
| hsa-let-7i      | hsa-let-7i     | 1 | 1 | 0 | 1 | 0 | 1 | 0 | 4 |
| hsa-miR-940     | hsa-mir-940    | 1 | 1 | 0 | 1 | 0 | 1 | 0 | 4 |
| hsa-miR-29b     | hsa-mir-29b-1  | 1 | 0 | 0 | 1 | 1 | 1 | 0 | 4 |
| hsa-miR-519a    | hsa-mir-519a-1 | 1 | 1 | 0 | 1 | 0 | 1 | 0 | 4 |
| hsa-miR-324-3p  | hsa-mir-324    | 1 | 1 | 0 | 1 | 0 | 1 | 0 | 4 |
| hsa-miR-574-5p  | hsa-mir-574    | 1 | 1 | 0 | 1 | 0 | 1 | 0 | 4 |
| hsa-miR-184     | hsa-mir-184    | 1 | 1 | 0 | 1 | 0 | 1 | 0 | 4 |
| hsa-miR-1248    | hsa-mir-1248   | 1 | 1 | 1 | 0 | 0 | 1 | 0 | 4 |
| hsa-miR-98      | hsa-mir-98     | 1 | 1 | 0 | 1 | 0 | 1 | 0 | 4 |
| hsa-let-7e      | hsa-let-7e     | 1 | 1 | 0 | 1 | 0 | 1 | 0 | 4 |
| hsa-miR-372     | hsa-mir-372    | 1 | 1 | 0 | 1 | 0 | 1 | 0 | 4 |
| hsa-miR-483-3p  | hsa-mir-483    | 1 | 1 | 0 | 1 | 0 | 1 | 0 | 4 |
| hsa-miR-143     | hsa-mir-143    | 1 | 1 | 0 | 1 | 0 | 1 | 0 | 4 |
| hsa-miR-663     | hsa-mir-663    | 1 | 1 | 0 | 1 | 0 | 1 | 0 | 4 |
| hsa-let-7a      | hsa-let-7a-3   | 1 | 1 | 0 | 1 | 0 | 1 | 0 | 4 |
| hsa-miR-526b    | hsa-mir-526b   | 1 | 1 | 0 | 1 | 0 | 1 | 0 | 4 |
| hsa-miR-1252    | hsa-mir-1252   | 1 | 1 | 1 | 0 | 0 | 1 | 0 | 4 |
| hsa-miR-20b     | hsa-mir-20b    | 1 | 1 | 0 | 1 | 0 | 1 | 0 | 4 |
| hsa-miR-942     | hsa-mir-942    | 1 | 1 | 0 | 1 | 0 | 1 | 0 | 4 |
| hsa-miR-19a     | hsa-mir-19a    | 1 | 1 | 0 | 1 | 0 | 1 | 0 | 4 |
| hsa-miR-638     | hsa-mir-638    | 1 | 1 | 0 | 1 | 0 | 1 | 0 | 4 |
| hsa-miR-519a    | hsa-mir-519a-2 | 1 | 1 | 0 | 1 | 0 | 1 | 0 | 4 |
| hsa-miR-338-5p  | hsa-mir-338    | 1 | 1 | 0 | 1 | 0 | 1 | 0 | 4 |
| hsa-miR-575     | hsa-mir-575    | 1 | 1 | 0 | 1 | 0 | 1 | 0 | 4 |
| hsa-miR-520e    | hsa-mir-520e   | 1 | 1 | 0 | 1 | 0 | 1 | 0 | 4 |
| hsa-miR-204     | hsa-mir-204    | 1 | 1 | 0 | 1 | 0 | 1 | 0 | 4 |
| hsa-let-7f      | hsa-let-7f-1   | 1 | 1 | 0 | 1 | 0 | 1 | 0 | 4 |
| hsa-miR-622     | hsa-mir-622    | 1 | 1 | 0 | 1 | 0 | 1 | 0 | 4 |
| hsa-miR-381     | hsa-mir-381    | 1 | 1 | 0 | 1 | 0 | 1 | 0 | 4 |
| hsa-miR-488     | hsa-mir-488    | 1 | 1 | 0 | 1 | 0 | 1 | 0 | 4 |
| hsa-miR-134     | hsa-mir-134    | 1 | 1 | 0 | 1 | 0 | 1 | 0 | 4 |
| hsa-miR-656     | hsa-mir-656    | 1 | 1 | 0 | 1 | 0 | 1 | 0 | 4 |
| hsa-miR-450b-3p | hsa-mir-450b   | 1 | 1 | 0 | 1 | 0 | 1 | 0 | 4 |
| hsa-miR-595     | hsa-mir-595    | 1 | 1 | 0 | 1 | 0 | 1 | 0 | 4 |
| hsa-miR-361-3p  | hsa-mir-361    | 1 | 1 | 0 | 1 | 0 | 1 | 0 | 4 |
| hsa-miR-335     | hsa-mir-335    | 1 | 1 | 0 | 1 | 0 | 1 | 0 | 4 |
| hsa-miR-449a    | hsa-mir-449a   | 1 | 1 | 0 | 1 | 0 | 1 | 0 | 4 |
| hsa-miR-19b     | hsa-mir-19b-1  | 1 | 1 | 0 | 1 | 0 | 1 | 0 | 4 |

|                 |                |   |   |   |   |   |   |   |   |
|-----------------|----------------|---|---|---|---|---|---|---|---|
| hsa-miR-644     | hsa-mir-644    | 1 | 1 | 0 | 1 | 0 | 1 | 0 | 4 |
| hsa-miR-29b     | hsa-mir-29b-2  | 1 | 0 | 0 | 1 | 1 | 1 | 0 | 4 |
| hsa-miR-501-5p  | hsa-mir-501    | 1 | 1 | 0 | 1 | 0 | 1 | 0 | 4 |
| hsa-miR-769-5p  | hsa-mir-769    | 1 | 1 | 0 | 1 | 0 | 1 | 0 | 4 |
| hsa-miR-515-5p  | hsa-mir-515-1  | 1 | 1 | 0 | 1 | 0 | 1 | 0 | 4 |
| hsa-miR-188-3p  | hsa-mir-188    | 1 | 1 | 0 | 1 | 0 | 1 | 0 | 4 |
| hsa-miR-211     | hsa-mir-211    | 1 | 1 | 0 | 1 | 0 | 1 | 0 | 4 |
| hsa-miR-374b    | hsa-mir-374b   | 1 | 1 | 0 | 1 | 0 | 1 | 0 | 4 |
| hsa-miR-623     | hsa-mir-623    | 1 | 1 | 0 | 1 | 0 | 1 | 0 | 4 |
| hsa-miR-519d    | hsa-mir-519d   | 1 | 1 | 0 | 1 | 0 | 1 | 0 | 4 |
| hsa-miR-342-5p  | hsa-mir-342    | 1 | 1 | 0 | 1 | 0 | 1 | 0 | 4 |
| hsa-miR-31      | hsa-mir-31     | 1 | 1 | 0 | 1 | 0 | 1 | 0 | 4 |
| hsa-miR-657     | hsa-mir-657    | 1 | 1 | 0 | 1 | 0 | 1 | 0 | 4 |
| hsa-miR-874     | hsa-mir-874    | 1 | 1 | 0 | 1 | 0 | 1 | 0 | 4 |
| hsa-let-7b      | hsa-let-7b     | 1 | 1 | 0 | 1 | 0 | 1 | 0 | 4 |
| hsa-miR-519b-3p | hsa-mir-519b   | 1 | 1 | 0 | 1 | 0 | 1 | 0 | 4 |
| hsa-miR-362-3p  | hsa-mir-362    | 1 | 1 | 0 | 1 | 0 | 1 | 0 | 4 |
| hsa-miR-139-5p  | hsa-mir-139    | 1 | 1 | 0 | 1 | 0 | 1 | 0 | 4 |
| hsa-miR-329     | hsa-mir-329-1  | 1 | 1 | 0 | 1 | 0 | 1 | 0 | 4 |
| hsa-miR-122     | hsa-mir-122    | 1 | 1 | 0 | 1 | 0 | 1 | 0 | 4 |
| hsa-miR-19b     | hsa-mir-19b-2  | 1 | 1 | 0 | 1 | 0 | 1 | 0 | 4 |
| hsa-miR-647     | hsa-mir-647    | 1 | 1 | 0 | 1 | 0 | 1 | 0 | 4 |
| hsa-let-7g      | hsa-let-7g     | 1 | 0 | 0 | 1 | 0 | 1 | 0 | 3 |
| hsa-miR-17      | hsa-mir-17     | 1 | 0 | 0 | 1 | 0 | 1 | 0 | 3 |
| hsa-miR-920     | hsa-mir-920    | 1 | 0 | 0 | 1 | 0 | 1 | 0 | 3 |
| hsa-miR-612     | hsa-mir-612    | 1 | 0 | 0 | 1 | 0 | 1 | 0 | 3 |
| hsa-miR-423-5p  | hsa-mir-423    | 0 | 1 | 0 | 1 | 0 | 1 | 0 | 3 |
| hsa-miR-520c-3p | hsa-mir-520c   | 1 | 0 | 0 | 1 | 0 | 1 | 0 | 3 |
| hsa-miR-1266    | hsa-mir-1266   | 1 | 1 | 0 | 0 | 0 | 1 | 0 | 3 |
| hsa-miR-455-3p  | hsa-mir-455    | 1 | 0 | 0 | 1 | 0 | 1 | 0 | 3 |
| hsa-miR-214     | hsa-mir-214    | 1 | 1 | 0 | 1 | 0 | 0 | 0 | 3 |
| hsa-miR-150     | hsa-mir-150    | 1 | 0 | 0 | 1 | 0 | 1 | 0 | 3 |
| hsa-miR-93      | hsa-mir-93     | 1 | 0 | 0 | 1 | 0 | 1 | 0 | 3 |
| hsa-miR-650     | hsa-mir-650    | 1 | 0 | 0 | 1 | 0 | 1 | 0 | 3 |
| hsa-let-7d      | hsa-let-7d     | 1 | 0 | 0 | 1 | 0 | 1 | 0 | 3 |
| hsa-miR-590-3p  | hsa-mir-590    | 1 | 0 | 0 | 1 | 0 | 1 | 0 | 3 |
| hsa-miR-520a-3p | hsa-mir-520a   | 1 | 0 | 0 | 1 | 0 | 1 | 0 | 3 |
| hsa-miR-1287    | hsa-mir-1287   | 1 | 1 | 0 | 0 | 0 | 1 | 0 | 3 |
| hsa-miR-31*     | hsa-mir-31     | 1 | 1 | 0 | 1 | 0 | 0 | 0 | 3 |
| hsa-let-7b*     | hsa-let-7b     | 1 | 1 | 0 | 1 | 0 | 0 | 0 | 3 |
| hsa-miR-525-3p  | hsa-mir-525    | 1 | 1 | 0 | 1 | 0 | 0 | 0 | 3 |
| hsa-miR-519a    | hsa-mir-519a-1 | 1 | 0 | 0 | 1 | 0 | 1 | 0 | 3 |
| hsa-miR-1827    | hsa-mir-1827   | 1 | 1 | 0 | 0 | 0 | 1 | 0 | 3 |
| hsa-miR-139-3p  | hsa-mir-139    | 1 | 1 | 0 | 1 | 0 | 0 | 0 | 3 |
| hsa-miR-767-5p  | hsa-mir-767    | 1 | 0 | 0 | 1 | 0 | 1 | 0 | 3 |
| hsa-let-7a      | hsa-let-7a-2   | 1 | 0 | 0 | 1 | 0 | 1 | 0 | 3 |
| hsa-miR-675     | hsa-mir-675    | 1 | 0 | 0 | 1 | 0 | 1 | 0 | 3 |
| hsa-miR-574-5p  | hsa-mir-574    | 1 | 0 | 0 | 1 | 0 | 1 | 0 | 3 |
| hsa-miR-1237    | hsa-mir-1237   | 1 | 1 | 0 | 0 | 0 | 1 | 0 | 3 |
| hsa-miR-513a-3p | hsa-mir-513a-1 | 1 | 1 | 0 | 0 | 0 | 1 | 0 | 3 |

|                 |                |   |   |   |   |   |   |   |   |
|-----------------|----------------|---|---|---|---|---|---|---|---|
| hsa-miR-324-3p  | hsa-mir-324    | 1 | 0 | 0 | 1 | 0 | 1 | 0 | 3 |
| hsa-let-7i      | hsa-let-7i     | 1 | 0 | 0 | 1 | 0 | 1 | 0 | 3 |
| hsa-miR-34b     | hsa-mir-34b    | 0 | 1 | 0 | 0 | 0 | 1 | 1 | 3 |
| hsa-miR-924     | hsa-mir-924    | 1 | 0 | 0 | 1 | 0 | 1 | 0 | 3 |
| hsa-miR-1272    | hsa-mir-1272   | 1 | 1 | 0 | 0 | 0 | 1 | 0 | 3 |
| hsa-miR-545     | hsa-mir-545    | 1 | 0 | 0 | 1 | 0 | 1 | 0 | 3 |
| hsa-miR-483-3p  | hsa-mir-483    | 1 | 0 | 0 | 1 | 0 | 1 | 0 | 3 |
| hsa-miR-184     | hsa-mir-184    | 1 | 0 | 0 | 1 | 0 | 1 | 0 | 3 |
| hsa-miR-98      | hsa-mir-98     | 1 | 0 | 0 | 1 | 0 | 1 | 0 | 3 |
| hsa-miR-661     | hsa-mir-661    | 1 | 0 | 0 | 1 | 0 | 1 | 0 | 3 |
| hsa-miR-337-3p  | hsa-mir-337    | 1 | 1 | 0 | 1 | 0 | 0 | 0 | 3 |
| hsa-miR-551b    | hsa-mir-551b   | 1 | 1 | 0 | 1 | 0 | 0 | 0 | 3 |
| hsa-let-7e      | hsa-let-7e     | 1 | 0 | 0 | 1 | 0 | 1 | 0 | 3 |
| hsa-miR-146b-3p | hsa-mir-146b   | 1 | 1 | 0 | 0 | 0 | 1 | 0 | 3 |
| hsa-miR-526b    | hsa-mir-526b   | 1 | 0 | 0 | 1 | 0 | 1 | 0 | 3 |
| hsa-miR-1289    | hsa-mir-1289-1 | 1 | 1 | 0 | 0 | 0 | 1 | 0 | 3 |
| hsa-miR-372     | hsa-mir-372    | 1 | 0 | 0 | 1 | 0 | 1 | 0 | 3 |
| hsa-miR-671-5p  | hsa-mir-671    | 1 | 1 | 0 | 1 | 0 | 0 | 0 | 3 |
| hsa-miR-20b     | hsa-mir-20b    | 1 | 0 | 0 | 1 | 0 | 1 | 0 | 3 |
| hsa-miR-875-3p  | hsa-mir-875    | 1 | 1 | 0 | 1 | 0 | 0 | 0 | 3 |
| hsa-miR-143     | hsa-mir-143    | 1 | 0 | 0 | 1 | 0 | 1 | 0 | 3 |
| hsa-miR-519a    | hsa-mir-519a-2 | 1 | 0 | 0 | 1 | 0 | 1 | 0 | 3 |
| hsa-let-7a      | hsa-let-7a-3   | 1 | 0 | 0 | 1 | 0 | 1 | 0 | 3 |
| hsa-miR-300     | hsa-mir-300    | 1 | 0 | 0 | 1 | 0 | 1 | 0 | 3 |
| hsa-miR-575     | hsa-mir-575    | 1 | 0 | 0 | 1 | 0 | 1 | 0 | 3 |
| hsa-miR-520e    | hsa-mir-520e   | 1 | 0 | 0 | 1 | 0 | 1 | 0 | 3 |
| hsa-miR-663b    | hsa-mir-663b   | 1 | 1 | 0 | 0 | 0 | 1 | 0 | 3 |
| hsa-miR-513a-3p | hsa-mir-513a-2 | 1 | 1 | 0 | 0 | 0 | 1 | 0 | 3 |
| hsa-miR-338-5p  | hsa-mir-338    | 1 | 0 | 0 | 1 | 0 | 1 | 0 | 3 |
| hsa-miR-19a     | hsa-mir-19a    | 1 | 0 | 0 | 1 | 0 | 1 | 0 | 3 |
| hsa-miR-939     | hsa-mir-939    | 1 | 0 | 0 | 1 | 0 | 1 | 0 | 3 |
| hsa-miR-1275    | hsa-mir-1275   | 1 | 1 | 0 | 0 | 0 | 1 | 0 | 3 |
| hsa-miR-488     | hsa-mir-488    | 1 | 0 | 0 | 1 | 0 | 1 | 0 | 3 |
| hsa-miR-628-5p  | hsa-mir-628    | 1 | 1 | 0 | 1 | 0 | 0 | 0 | 3 |
| hsa-miR-663     | hsa-mir-663    | 1 | 0 | 0 | 1 | 0 | 1 | 0 | 3 |
| hsa-miR-204     | hsa-mir-204    | 1 | 0 | 0 | 1 | 0 | 1 | 0 | 3 |
| hsa-let-7f      | hsa-let-7f-1   | 1 | 0 | 0 | 1 | 0 | 1 | 0 | 3 |
| hsa-miR-595     | hsa-mir-595    | 1 | 0 | 0 | 1 | 0 | 1 | 0 | 3 |
| hsa-miR-1289    | hsa-mir-1289-2 | 1 | 1 | 0 | 0 | 0 | 1 | 0 | 3 |
| hsa-miR-381     | hsa-mir-381    | 1 | 0 | 0 | 1 | 0 | 1 | 0 | 3 |
| hsa-miR-501-5p  | hsa-mir-501    | 1 | 0 | 0 | 1 | 0 | 1 | 0 | 3 |
| hsa-miR-1910    | hsa-mir-1910   | 1 | 1 | 1 | 0 | 0 | 0 | 0 | 3 |
| hsa-miR-34a*    | hsa-mir-34a    | 1 | 1 | 0 | 1 | 0 | 0 | 0 | 3 |
| hsa-miR-449a    | hsa-mir-449a   | 1 | 0 | 0 | 1 | 0 | 1 | 0 | 3 |
| hsa-miR-708     | hsa-mir-708    | 1 | 1 | 0 | 1 | 0 | 0 | 0 | 3 |
| hsa-miR-134     | hsa-mir-134    | 1 | 0 | 0 | 1 | 0 | 1 | 0 | 3 |
| hsa-miR-615-5p  | hsa-mir-615    | 1 | 1 | 0 | 1 | 0 | 0 | 0 | 3 |
| hsa-miR-638     | hsa-mir-638    | 1 | 0 | 0 | 1 | 0 | 1 | 0 | 3 |
| hsa-miR-619     | hsa-mir-619    | 0 | 1 | 0 | 1 | 0 | 1 | 0 | 3 |
| hsa-miR-410     | hsa-mir-410    | 1 | 1 | 0 | 1 | 0 | 0 | 0 | 3 |

|                 |                |   |   |   |   |   |   |   |   |
|-----------------|----------------|---|---|---|---|---|---|---|---|
| hsa-miR-143*    | hsa-mir-143    | 1 | 1 | 0 | 1 | 0 | 0 | 0 | 3 |
| hsa-miR-515-5p  | hsa-mir-515-1  | 1 | 0 | 0 | 1 | 0 | 1 | 0 | 3 |
| hsa-miR-1204    | hsa-mir-1204   | 1 | 1 | 0 | 0 | 0 | 1 | 0 | 3 |
| hsa-miR-361-3p  | hsa-mir-361    | 1 | 0 | 0 | 1 | 0 | 1 | 0 | 3 |
| hsa-miR-335     | hsa-mir-335    | 1 | 0 | 0 | 1 | 0 | 1 | 0 | 3 |
| hsa-miR-19b     | hsa-mir-19b-1  | 1 | 0 | 0 | 1 | 0 | 1 | 0 | 3 |
| hsa-miR-940     | hsa-mir-940    | 1 | 0 | 0 | 1 | 0 | 1 | 0 | 3 |
| hsa-miR-622     | hsa-mir-622    | 1 | 0 | 0 | 1 | 0 | 1 | 0 | 3 |
| hsa-miR-519d    | hsa-mir-519d   | 1 | 0 | 0 | 1 | 0 | 1 | 0 | 3 |
| hsa-miR-1276    | hsa-mir-1276   | 1 | 1 | 0 | 0 | 0 | 1 | 0 | 3 |
| hsa-miR-188-3p  | hsa-mir-188    | 1 | 0 | 0 | 1 | 0 | 1 | 0 | 3 |
| hsa-miR-656     | hsa-mir-656    | 1 | 0 | 0 | 1 | 0 | 1 | 0 | 3 |
| hsa-miR-211     | hsa-mir-211    | 1 | 0 | 0 | 1 | 0 | 1 | 0 | 3 |
| hsa-miR-519b-3p | hsa-mir-519b   | 1 | 0 | 0 | 1 | 0 | 1 | 0 | 3 |
| hsa-miR-342-5p  | hsa-mir-342    | 1 | 0 | 0 | 1 | 0 | 1 | 0 | 3 |
| hsa-miR-1224-3p | hsa-mir-1224   | 1 | 1 | 0 | 0 | 0 | 1 | 0 | 3 |
| hsa-miR-329     | hsa-mir-329-1  | 1 | 0 | 0 | 1 | 0 | 1 | 0 | 3 |
| hsa-miR-548c-3p | hsa-mir-548c   | 1 | 1 | 0 | 1 | 0 | 0 | 0 | 3 |
| hsa-miR-31      | hsa-mir-31     | 1 | 0 | 0 | 1 | 0 | 1 | 0 | 3 |
| hsa-miR-524-3p  | hsa-mir-524    | 1 | 1 | 0 | 1 | 0 | 0 | 0 | 3 |
| hsa-miR-644     | hsa-mir-644    | 1 | 0 | 0 | 1 | 0 | 1 | 0 | 3 |
| hsa-miR-139-5p  | hsa-mir-139    | 1 | 0 | 0 | 1 | 0 | 1 | 0 | 3 |
| hsa-let-7b      | hsa-let-7b     | 1 | 0 | 0 | 1 | 0 | 1 | 0 | 3 |
| hsa-miR-450b-3p | hsa-mir-450b   | 1 | 0 | 0 | 1 | 0 | 1 | 0 | 3 |
| hsa-miR-1207-5p | hsa-mir-1207   | 1 | 1 | 0 | 0 | 0 | 1 | 0 | 3 |
| hsa-miR-28-5p   | hsa-mir-28     | 1 | 1 | 0 | 1 | 0 | 0 | 0 | 3 |
| hsa-miR-362-3p  | hsa-mir-362    | 1 | 0 | 0 | 1 | 0 | 1 | 0 | 3 |
| hsa-miR-892a    | hsa-mir-892a   | 1 | 1 | 0 | 1 | 0 | 0 | 0 | 3 |
| hsa-miR-122     | hsa-mir-122    | 1 | 0 | 0 | 1 | 0 | 1 | 0 | 3 |
| hsa-miR-19b     | hsa-mir-19b-2  | 1 | 0 | 0 | 1 | 0 | 1 | 0 | 3 |
| hsa-miR-942     | hsa-mir-942    | 1 | 0 | 0 | 1 | 0 | 1 | 0 | 3 |
| hsa-miR-623     | hsa-mir-623    | 1 | 0 | 0 | 1 | 0 | 1 | 0 | 3 |
| hsa-miR-520d-3p | hsa-mir-520d   | 1 | 0 | 0 | 1 | 0 | 1 | 0 | 3 |
| hsa-miR-769-5p  | hsa-mir-769    | 1 | 0 | 0 | 1 | 0 | 1 | 0 | 3 |
| hsa-miR-558     | hsa-mir-558    | 1 | 0 | 0 | 1 | 0 | 1 | 0 | 3 |
| hsa-miR-491-5p  | hsa-mir-491    | 1 | 0 | 0 | 1 | 0 | 1 | 0 | 3 |
| hsa-miR-193a-5p | hsa-mir-193a   | 1 | 0 | 0 | 1 | 0 | 1 | 0 | 3 |
| hsa-miR-657     | hsa-mir-657    | 1 | 0 | 0 | 1 | 0 | 1 | 0 | 3 |
| hsa-let-7f      | hsa-let-7f-2   | 1 | 0 | 0 | 1 | 0 | 1 | 0 | 3 |
| hsa-miR-1254    | hsa-mir-1254   | 1 | 1 | 0 | 0 | 0 | 1 | 0 | 3 |
| hsa-miR-342-3p  | hsa-mir-342    | 1 | 0 | 0 | 1 | 0 | 1 | 0 | 3 |
| hsa-miR-1323    | hsa-mir-1323   | 1 | 1 | 0 | 0 | 0 | 1 | 0 | 3 |
| hsa-miR-329     | hsa-mir-329-2  | 1 | 0 | 0 | 1 | 0 | 1 | 0 | 3 |
| hsa-miR-138     | hsa-mir-138-1  | 1 | 0 | 0 | 1 | 0 | 1 | 0 | 3 |
| hsa-miR-647     | hsa-mir-647    | 1 | 0 | 0 | 1 | 0 | 1 | 0 | 3 |
| hsa-miR-551a    | hsa-mir-551a   | 1 | 1 | 0 | 1 | 0 | 0 | 0 | 3 |
| hsa-miR-874     | hsa-mir-874    | 1 | 0 | 0 | 1 | 0 | 1 | 0 | 3 |
| hsa-miR-583     | hsa-mir-583    | 1 | 0 | 0 | 1 | 0 | 1 | 0 | 3 |
| hsa-miR-515-5p  | hsa-mir-515-2  | 1 | 0 | 0 | 1 | 0 | 1 | 0 | 3 |
| hsa-miR-1285    | hsa-mir-1285-1 | 1 | 1 | 0 | 0 | 0 | 1 | 0 | 3 |

|                 |                |   |   |   |   |   |   |   |   |
|-----------------|----------------|---|---|---|---|---|---|---|---|
| hsa-miR-384     | hsa-mir-384    | 1 | 0 | 0 | 1 | 0 | 1 | 0 | 3 |
| hsa-miR-138     | hsa-mir-138-2  | 1 | 0 | 0 | 1 | 0 | 1 | 0 | 3 |
| hsa-miR-20a     | hsa-mir-20a    | 1 | 0 | 0 | 1 | 0 | 1 | 0 | 3 |
| hsa-miR-526b*   | hsa-mir-526b   | 1 | 1 | 0 | 1 | 0 | 0 | 0 | 3 |
| hsa-miR-624     | hsa-mir-624    | 1 | 0 | 0 | 1 | 0 | 1 | 0 | 3 |
| hsa-miR-1280    | hsa-mir-1280   | 1 | 1 | 0 | 0 | 0 | 1 | 0 | 3 |
| hsa-let-7a      | hsa-let-7a-1   | 1 | 0 | 0 | 1 | 0 | 1 | 0 | 3 |
| hsa-miR-769-3p  | hsa-mir-769    | 1 | 0 | 0 | 1 | 0 | 1 | 0 | 3 |
| hsa-miR-1225-3p | hsa-mir-1225   | 1 | 1 | 0 | 0 | 0 | 1 | 0 | 3 |
| hsa-miR-421     | hsa-mir-421    | 1 | 0 | 0 | 1 | 0 | 1 | 0 | 3 |
| hsa-miR-578     | hsa-mir-578    | 1 | 1 | 0 | 1 | 0 | 0 | 0 | 3 |
| hsa-miR-374b    | hsa-mir-374b   | 1 | 0 | 0 | 1 | 0 | 1 | 0 | 3 |
| hsa-miR-608     | hsa-mir-608    | 1 | 0 | 0 | 1 | 0 | 1 | 0 | 3 |
| hsa-miR-520b    | hsa-mir-520b   | 1 | 0 | 0 | 1 | 0 | 1 | 0 | 3 |
| hsa-miR-1260    | hsa-mir-1260   | 1 | 1 | 0 | 0 | 0 | 1 | 0 | 3 |
| hsa-miR-648     | hsa-mir-648    | 1 | 0 | 0 | 1 | 0 | 1 | 0 | 3 |
| hsa-miR-34a     | hsa-mir-34a    | 1 | 0 | 0 | 1 | 0 | 1 | 0 | 3 |
| hsa-miR-556-5p  | hsa-mir-556    | 1 | 1 | 0 | 1 | 0 | 0 | 0 | 3 |
| hsa-let-7c      | hsa-let-7c     | 1 | 0 | 0 | 1 | 0 | 1 | 0 | 3 |
| hsa-miR-490-5p  | hsa-mir-490    | 1 | 1 | 0 | 1 | 0 | 0 | 0 | 3 |
| hsa-miR-588     | hsa-mir-588    | 1 | 0 | 0 | 1 | 0 | 1 | 0 | 3 |
| hsa-miR-136     | hsa-mir-136    | 1 | 1 | 0 | 1 | 0 | 0 | 0 | 3 |
| hsa-miR-519c-3p | hsa-mir-519c   | 1 | 0 | 0 | 1 | 0 | 1 | 0 | 3 |
| hsa-miR-1285    | hsa-mir-1285-2 | 1 | 1 | 0 | 0 | 0 | 1 | 0 | 3 |
| hsa-miR-140-3p  | hsa-mir-140    | 1 | 0 | 0 | 1 | 0 | 1 | 0 | 3 |
| hsa-miR-603     | hsa-mir-603    | 1 | 1 | 0 | 0 | 0 | 1 | 0 | 3 |
| hsa-miR-625     | hsa-mir-625    | 1 | 0 | 0 | 1 | 0 | 1 | 0 | 3 |
| hsa-miR-1321    | hsa-mir-1321   | 1 | 1 | 0 | 0 | 0 | 1 | 0 | 3 |
| hsa-miR-765     | hsa-mir-765    | 1 | 0 | 0 | 1 | 0 | 1 | 0 | 3 |
| hsa-miR-570     | hsa-mir-570    | 1 | 0 | 0 | 1 | 0 | 1 | 0 | 3 |
| hsa-miR-432     | hsa-mir-432    | 1 | 0 | 0 | 1 | 0 | 1 | 0 | 3 |
| hsa-miR-106b    | hsa-mir-106b   | 1 | 0 | 0 | 1 | 0 | 1 | 0 | 3 |
| hsa-miR-106a    | hsa-mir-106a   | 1 | 0 | 0 | 1 | 0 | 1 | 0 | 3 |

This table displays the miRNAs that are bioinformatically predicted to target the 3' UTR region of PDGF-BB mRNA by three or more prediction tools. Software version/update is indicated below.

| Prediction Program | miRwalk               | miRanda             | miRDB      | Diana-microT | PICTAR     | Targetscan  | RNA22    |
|--------------------|-----------------------|---------------------|------------|--------------|------------|-------------|----------|
| Version Or Date    | 15 March 2011 release | August 2010 release | April 2009 | Version 3.0  | March 2007 | Version 5.1 | May 2008 |
