# Supplementary material
Source: PubMed Central journal article supplement (PMC3490519)
Supplement: supp_dds358_dds358supp_table3.pdf [file supp_dds358_dds358supp_table3.pdf]

**Supplementary Table S3.** Oligonucleotide, siRNA, probe and primer sequences.

| <b>siRNA sequences</b>                                            |                                                                |                                                  |
|-------------------------------------------------------------------|----------------------------------------------------------------|--------------------------------------------------|
| anti-PDGF-BB                                                      | sense                                                          | 5'-GCACCGAGGUGUUCGAGAUtt-3'                      |
|                                                                   | antisense                                                      | 5'-AUCUCGAACACCUCGGUGCgc-3'                      |
| control siRNA                                                     | Ambion proprietary information<br>Product number: 4390843      |                                                  |
| anti-PTEN                                                         | sense                                                          | 5'-GUUAGCAGAAACAAAAGGAGAUUAUCA-3'                |
|                                                                   | antisense                                                      | 5'-UUGAUUAUCUCCUUUUGUUUCUGCUAAC-3'               |
| control siRNA                                                     | 5' -UUCUCCGAACGUGUCACGUTT- 3'<br>5' -ACGUGACACGUUCGGAGAATT- 3' |                                                  |
| <b>Oligonucleotide sequences for miRNA modulation</b>             |                                                                |                                                  |
| LNA-modified anti-miR-21                                          | 5'-CAACATCAGTCTGATAAGCT-3'                                     |                                                  |
| scrambled sequence                                                | 5'-GTGTAACACGTCTATACGCCCA-3'                                   |                                                  |
| <b>Detection probes for FISH (digoxigenin-labelled at the 5')</b> |                                                                |                                                  |
| anti-miR-21                                                       | 5'-TCAACATCAGTCTGATAAGCTA-3'                                   |                                                  |
| scrambled sequence                                                | 5'-GTGTAACACGTCTATACGCCCA-3'                                   |                                                  |
| U6snRNA                                                           | 5'-CACGAATTTGCGTGTCATCCTT-3'                                   |                                                  |
| <b>Primers used for qPCR</b>                                      |                                                                | <b>Target sequence</b>                           |
| miR-21                                                            | Exiqon                                                         | UAGCUUAUCAGACUGAUGUUGA<br>Catalog Number: 204230 |
| miR-128                                                           |                                                                | UCACAGUGAACCGGUCUCUUU<br>Catalog Number: 204626  |
| miR-221                                                           |                                                                | AGCUACAUUGUCUGCGGGUUUC<br>Catalog Number: 204532 |
| snord44                                                           |                                                                | Product Number: 203902                           |
| snord110                                                          |                                                                | Product Number: 203912                           |
| U6snRNA                                                           |                                                                | Product Number: 203907                           |
|                                                                   |                                                                |                                                  |
| PDGF-BB                                                           | Qiagen                                                         | Product number: QT00001260                       |
| PTEN                                                              |                                                                | Product number: QT02423400                       |
| HPRT1                                                             |                                                                | Product number: QT00059066                       |

| <b>miRNA PCR plate</b> | <b>microRNA</b> | <b>Target sequence</b>  | <b>LNA™ PCR primer set, Product No.</b> |
|------------------------|-----------------|-------------------------|-----------------------------------------|
|                        | hsa-let-7b      | UGAGGUAGUAGGUUGUGUGUU   | 204750                                  |
|                        | hsa-miR-101     | UACAGUACUGUGAUACUGAA    | 204786                                  |
|                        | hsa-miR-106a    | AAAAGUGCUUACAGUGCAGGUAG | 204563                                  |
|                        | hsa-miR-106b    | UAAAGUGCUGACAGUGCAGAU   | 204760                                  |
|                        | hsa-miR-10b     | UACCCUGUAGAACCGAAUUUGUG | 204753                                  |
|                        | hsa-miR-124     | UAAGGCACGCGGUGAAUGCC    | 204319                                  |
|                        | hsa-miR-128     | UCACAGUGAACCGGUCUCUUU   | 204626                                  |
|                        | hsa-miR-130a    | CAGUGCAAUGUUAAAAGGGCAU  | 204658                                  |
|                        | hsa-miR-130b    | CAGUGCAAUGAUGAAAGGGCAU  | 204317                                  |
|                        | hsa-miR-132     | UACAGUCUACAGCCAUGGUCG   | 204129                                  |
|                        | hsa-miR-135b    | UAUGGCUUUUCAUCCUAUGUGA  | 204130                                  |
|                        | hsa-miR-148a    | UCAGUGCACUACAGAACUUUGU  | 204121                                  |
|                        | hsa-miR-149     | UCUGGCUCGUGUCUUCACUCCC  | 204321                                  |
|                        | hsa-miR-17      | CAAAGUGCUIACAGUGCAGGUAG | 204771                                  |
|                        | hsa-miR-181a    | AACAUUCAACGCGUCGGUGAGU  | 204566                                  |
|                        | hsa-miR-181c    | AACAUUCAACCGUCGGUGAGU   | 204683                                  |
|                        | hsa-miR-185     | UGGAGAGAAAGGCAGUCCUGA   | 204475                                  |
|                        | hsa-miR-188-5p  | CAUCCCUUGCAUGGUGGAGGG   | 204239                                  |
|                        | hsa-miR-19b     | UGUGCAAUCCAUGCAAACUGA   | 204450                                  |
|                        | hsa-miR-1237    | UCCUUCUGCUCGUCGCCCCAG   | 204069                                  |
|                        | hsa-miR-200c    | UAAUACUGCCGGGUAUUGAUGGA | 204482                                  |
|                        | hsa-miR-203     | GUGAAAUGUUUAGGACCACUAG  | 204285                                  |
|                        | hsa-miR-20a     | UAAAGUGCUIAUAGUGCAGGUAG | 204292                                  |
|                        | hsa-miR-21      | UAGCUUAUCAGACUGAUGUUGA  | 204230                                  |
|                        | hsa-miR-210     | CUGUGCGUGUGACAGCGGCUGA  | 204333                                  |
|                        | hsa-miR-25      | CAUUGCACUUGUCUCGGUCUGA  | 204361                                  |
|                        | hsa-miR-26a     | UUCAAGUAAUCCAGGAUAGGCU  | 204724                                  |
|                        | hsa-miR-27a     | UUCACAGUGGCUAAGUUCCGC   | 204764                                  |
|                        | hsa-miR-29b     | UAGCACCAUUUGAAAUCAGUGUU | 204679                                  |
|                        | hsa-miR-30a     | UGUAAACAUCCUCGACUGGAAG  | 204791                                  |
|                        | hsa-miR-30c     | UGUAAACAUCCUACACUCUCAGC | 204783                                  |
|                        | hsa-miR-32      | UAUUGCACAUUACUAAGUUGCA  | 204792                                  |
|                        | hsa-miR-328     | CUGGCCUCUCUGCCCUUCCGU   | 204364                                  |
|                        | hsa-miR-34a     | UGGCAGUGUCUUAGCUGGUUGU  | 204486                                  |
|                        | hsa-miR-367     | AAUUGCACUUUAGCAAUGGUGA  | 204784                                  |
|                        | hsa-miR-448     | UUGCAUAUGUAGGAUGUCCCAU  | 204643                                  |
|                        | hsa-miR-451     | AAACCGUUACCAUACUGAGUU   | 204734                                  |
|                        | hsa-miR-566     | GGGCGCCUGUGAUCCCAAC     | 204282                                  |
|                        | hsa-miR-573     | CUGAAGUGAUGUGAACUGAUCAG | 204216                                  |
|                        | hsa-miR-623     | AUCCCUUGCAGGGCUGUUGGGU  | 204019                                  |
|                        | hsa-miR-7       | UGGAAGACUAGUGAUUUUGUUGU | 204592                                  |
|                        | hsa-miR-9       | UCUUUGGUUAUCUAGCUGUAUGA | 204513                                  |
|                        | hsa-miR-92a     | UAUUGCACUUGUCCCGCCUGU   | 204258                                  |

|            |                         |        |
|------------|-------------------------|--------|
| hsa-miR-93 | CAAAGUGCUGUUCGUGCAGGUAG | 204715 |
| U6 snRNA   | REFERENCE GENE          | 203907 |
| SNORD49A   | REFERENCE GENE          | 203904 |
| SNORD44    | REFERENCE GENE          | 203902 |
